# Supplementary material for: Screening, prevalence, treatment and control of kidney disease in patients with type 1 and type 2 diabetes in low-to-middle-income countries (2005–2017): the International Diabetes Management Practices Study (IDMPS)
Source: Springer Nature journal article supplement (doi:10.1007/s00125-021-05406-6), 2021-02-16
Supplement: MOESM1 [file 18864904]

### **ESM methods**

The sample size for IDMPS was determined on a country-basis, based on the primary objective of IDMPS, which was to assess the therapeutic management of patients with type 2 diabetes, and on the precision that was expected.

Based on the assumption that insulin was the least prescribed therapy for patients with type 2 diabetes, the sample size was determined to establish the prevalence of insulin treated patients with type 2 diabetes. The sample size was calculated to give an absolute precision of 20% of the estimated proportion of patients with type 2 diabetes receiving insulin and a confidence interval of 95%, using the following formula:

$$n = p (1-p) \times (\epsilon_{\alpha} / e)^2$$

where:

$n$  = the per country sample size

$p$  = the estimated proportion of patients with T2D treated with insulin

$\epsilon_{\alpha}$  = 1.96 for  $\alpha$  = 5%

$e$  = the absolute precision (20%)  $\times p$  = the relative precision

Given this information, a computation table was determined that took into account the proportion of insulin treatments among all the prescriptions for patients with diabetes:

| <b>Proportion</b> | <b>Sample size</b> |
|-------------------|--------------------|
| 5%                | 1825               |
| 10%               | 864                |
| 15%               | 544                |
| 20%               | 384                |

For example, if in a given country, 10% of the patients receive insulin ( $p$ ) with an absolute precision of 20%, the sample size (number of patients with type 2 diabetes to be recruited) would be 864 patients in this country for each wave.

**ESM Table 1.** Number of patients in participating countries and regions by wave

|                                     | Wave 1 / 2005            | Wave 1 / 2005             | Wave 2 / 2006 | Wave 2 / 2006  | Wave 3 / 2008 | Wave 3 / 2008  | Wave 4 / 2010 | Wave 4 / 2010 | Wave 5 / 2011–12 | Wave 5 / 2011–12 | Wave 6 / 2013–14 | Wave 6 / 2013–14 | Wave 7 / 2016–17 | Wave 7 / 2016–17 |
|-------------------------------------|--------------------------|---------------------------|---------------|----------------|---------------|----------------|---------------|---------------|------------------|------------------|------------------|------------------|------------------|------------------|
|                                     | T1D                      | T2D                       | T1D           | T2D            | T1D           | T2D            | T1D           | T2D           | T1D              | T2D              | T1D              | T2D              | T1D              | T2D              |
| Region/Country <sup>a</sup> , n (%) | N=1845                   | N=9918                    | N=3507        | N=17,232       | N=2337        | N=12,210       | N=958         | N=5343        | N=2789           | N=9603           | N=1643           | N=5479           | N=2000           | N=6303           |
| <b>Africa</b>                       | 68 <sup>b</sup><br>(3.7) | 208 <sup>b</sup><br>(2.1) | 824<br>(23.5) | 2342<br>(13.6) | 662<br>(28.3) | 1721<br>(14.1) | 116<br>(12.1) | 314<br>(5.9)  | 741<br>(26.6)    | 2270<br>(23.6)   | 652<br>(39.7)    | 1761<br>(32.1)   | 788<br>(39.4)    | 2403<br>(38.1)   |
| Algeria                             | 0                        | 0                         | 217<br>(6.2)  | 456<br>(2.6)   | 194<br>(8.3)  | 469<br>(3.8)   | 0             | 0             | 222<br>(8.0)     | 514<br>(5.4)     | 79<br>(4.8)      | 196<br>(3.6)     | 82<br>(4.1)      | 198<br>(3.1)     |
| Cameroon                            | 0                        | 0                         | 0             | 0              | 0             | 0              | 0             | 0             | 38<br>(1.4)      | 524<br>(5.5)     | 92<br>(5.6)      | 199<br>(3.6)     | 77<br>(3.9)      | 211<br>(3.3)     |
| Democratic Republic of Congo        | 0                        | 0                         | 0             | 0              | 0             | 0              | 0             | 0             | 0                | 0                | 0                | 0                | 25<br>(1.3)      | 50<br>(0.8)      |
| Egypt                               | 0                        | 0                         | 120<br>(3.4)  | 289<br>(1.7)   | 103<br>(4.4)  | 325<br>(2.7)   | 116<br>(12.1) | 314<br>(5.9)  | 80<br>(2.9)      | 371<br>(3.9)     | 132<br>(8.0)     | 290<br>(5.3)     | 149<br>(7.5)     | 300<br>(4.8)     |
| Ivory Coast                         | 0                        | 0                         | 0             | 0              | 0             | 0              | 0             | 0             | 0                | 0                | 36<br>(2.2)      | 101<br>(1.8)     | 36<br>(1.8)      | 99<br>(1.6)      |
| Kenya                               | 0                        | 0                         | 0             | 0              | 0             | 0              | 0             | 0             | 0                | 0                | 0                | 0                | 7<br>(0.4)       | 187<br>(3.0)     |
| Madagascar                          | 0                        | 0                         | 0             | 0              | 0             | 0              | 0             | 0             | 0                | 0                | 0                | 0                | 25<br>(1.3)      | 50<br>(0.8)      |
| Morocco                             | 0                        | 0                         | 215<br>(6.1)  | 509<br>(3.0)   | 244<br>(10.4) | 537<br>(4.4)   | 0             | 0             | 240<br>(8.6)     | 498<br>(5.2)     | 109<br>(6.6)     | 239<br>(4.4)     | 91<br>(4.6)      | 211<br>(3.3)     |
| Nigeria                             | 0                        | 0                         | 0             | 0              | 0             | 0              | 0             | 0             | 0                | 0                | 20<br>(1.2)      | 150<br>(2.7)     | 77<br>(3.9)      | 304<br>(4.8)     |
| Senegal                             | 0                        | 0                         | 0             | 0              | 0             | 0              | 0             | 0             | 25<br>(0.9)      | 50<br>(0.5)      | 30<br>(1.8)      | 96<br>(1.8)      | 43<br>(2.2)      | 101<br>(1.6)     |
| South Africa                        | 0                        | 0                         | 170<br>(4.8)  | 688<br>(4.0)   | 0             | 0              | 0             | 0             | 0                | 0                | 31<br>(1.9)      | 66<br>(1.2)      | 49<br>(2.5)      | 396<br>(6.3)     |
| Tunisia                             | 68<br>(3.7)              | 208<br>(2.1)              | 102<br>(2.9)  | 400<br>(2.3)   | 121<br>(5.2)  | 390<br>(3.2)   | 0             | 0             | 136<br>(4.9)     | 313<br>(3.3)     | 97<br>(5.9)      | 354<br>(6.5)     | 127<br>(6.4)     | 296<br>(4.7)     |
| Zimbabwe                            | 0                        | 0                         | 0             | 0              | 0             | 0              | 0             | 0             | 0                | 0                | 26<br>(1.6)      | 70<br>(1.3)      | 0                | 0                |
| <b>Asia</b>                         | 459<br>(24.9)            | 5392<br>(54.4)            | 618<br>(17.6) | 4678<br>(27.1) | 212<br>(9.1)  | 1604<br>(13.1) | 0             | 0             | 428<br>(15.3)    | 1195<br>(12.4)   | 56<br>(3.4)      | 301<br>(5.5)     | 45<br>(2.3)      | 694<br>(11.0)    |
| Bangladesh                          | 5<br>(0.3)               | 520<br>(5.2)              | 0             | 0              | 0             | 0              | 0             | 0             | 0                | 0                | 0                | 80<br>(1.5)      | 1<br>(0.1)       | 199<br>(3.2)     |
| China                               | 63<br>(3.4)              | 548<br>(5.5)              | 102<br>(2.9)  | 540<br>(3.1)   | 140<br>(6.0)  | 521<br>(4.3)   | 0             | 0             | 0                | 0                | 0                | 0                | 0                | 0                |
| Hong Kong                           | 46<br>(2.5)              | 373<br>(3.8)              | 35<br>(1.0)   | 511<br>(3.0)   | 0             | 0              | 0             | 0             | 0                | 0                | 0                | 0                | 0                | 0                |
| India                               | 116<br>(6.3)             | 1639<br>(16.5)            | 181<br>(5.2)  | 854<br>(5.0)   | 0             | 0              | 0             | 0             | 368<br>(13.2)    | 994<br>(10.4)    | 0                | 0                | 44<br>(2.2)      | 495<br>(7.9)     |
| Indonesia                           | 15<br>(0.8)              | 708<br>(7.1)              | 12<br>(0.3)   | 674<br>(3.9)   | 0             | 0              | 0             | 0             | 0                | 0                | 0                | 0                | 0                | 0                |

|                        |               |                |               |                |               |                |               |                |               |                |               |                |               |                |
|------------------------|---------------|----------------|---------------|----------------|---------------|----------------|---------------|----------------|---------------|----------------|---------------|----------------|---------------|----------------|
| Korea                  | 151<br>(8.2)  | 845<br>(8.5)   | 0             | 0              | 0             | 0              | 0             | 0              | 0             | 0              | 0             | 0              | 0             | 0              |
| Malaysia               | 0             | 0              | 64<br>(1.8)   | 472<br>(2.7)   | 39<br>(1.7)   | 561<br>(4.6)   | 0             | 0              | 0             | 0              | 0             | 0              | 0             | 0              |
| Pakistan <sup>b</sup>  | 0             | 0              | 0             | 0              | 0             | 0              | 0             | 0              | 60<br>(2.2)   | 201<br>(2.1)   | 56<br>(3.4)   | 221<br>(4.0)   | NA            | NA             |
| South Korea            | 0             | 0              | 142<br>(4.0)  | 807<br>(4.7)   | 0             | 0              | 0             | 0              | 0             | 0              | 0             | 0              | 0             | 0              |
| Taiwan                 | 42<br>(2.3)   | 382<br>(3.9)   | 39<br>(1.1)   | 398<br>(2.3)   | 0             | 0              | 0             | 0              | 0             | 0              | 0             | 0              | 0             | 0              |
| Thailand               | 21<br>(1.1)   | 377<br>(3.8)   | 43<br>(1.2)   | 422<br>(2.4)   | 33<br>(1.4)   | 522<br>(4.3)   | 0             | 0              | 0             | 0              | 0             | 0              | 0             | 0              |
| <b>Eurasia</b>         | 0             | 0              | 0             | 0              | 0             | 0              | 0             | 0              | 791<br>(28.4) | 1834<br>(19.1) | 713<br>(43.4) | 1461<br>(26.7) | 657<br>(32.9) | 1330<br>(21.1) |
| Azerbaijan             | 0             | 0              | 0             | 0              | 0             | 0              | 0             | 0              | 0             | 0              | 28<br>(1.7)   | 122<br>(2.2)   | 0             | 0              |
| Georgia                | 0             | 0              | 0             | 0              | 0             | 0              | 0             | 0              | 48<br>(1.7)   | 152<br>(1.6)   | 0             | 0              | 0             | 0              |
| Kazakhstan             | 0             | 0              | 0             | 0              | 0             | 0              | 0             | 0              | 185 (6.6)     | 413<br>(4.3)   | 0             | 0              | 0             | 0              |
| Russia                 | 0             | 0              | 0             | 0              | 0             | 0              | 0             | 0              | 270<br>(9.7)  | 540<br>(5.6)   | 394<br>(24.0) | 790<br>(14.4)  | 395<br>(19.8) | 800<br>(12.7)  |
| Ukraine                | 0             | 0              | 0             | 0              | 0             | 0              | 0             | 0              | 199<br>(7.1)  | 353<br>(3.7)   | 211<br>(12.8) | 389<br>(7.1)   | 262<br>(13.1) | 530<br>(8.4)   |
| Uzbekistan             | 0             | 0              | 0             | 0              | 0             | 0              | 0             | 0              | 89<br>(3.2)   | 376<br>(3.9)   | 80<br>(4.9)   | 160<br>(2.9)   | 0             | 0              |
| <b>Europe</b>          | 914<br>(49.5) | 2605<br>(26.3) | 807<br>(23.0) | 2216<br>(12.9) | 247<br>(10.6) | 1158<br>(9.5)  | 50<br>(5.2)   | 603<br>(11.3)  | 115<br>(4.1)  | 842<br>(8.8)   | 0             | 0              | 0             | 0              |
| Bosnia and Herzegovina | 124<br>(6.7)  | 383<br>(3.9)   | 0             | 0              | 0             | 0              | 0             | 0              | 0             | 0              | 0             | 0              | 0             | 0              |
| Bulgaria               | 233<br>(12.6) | 539<br>(5.4)   | 244<br>(7.0)  | 532<br>(3.1)   | 0             | 0              | 0             | 0              | 0             | 0              | 0             | 0              | 0             | 0              |
| Romania                | 371<br>(20.1) | 747<br>(7.5)   | 356<br>(10.2) | 742<br>(4.3)   | 0             | 0              | 0             | 0              | 0             | 0              | 0             | 0              | 0             | 0              |
| Turkey                 | 186<br>(10.1) | 936<br>(9.4)   | 207<br>(5.9)  | 942<br>(5.5)   | 247<br>(10.6) | 1158<br>(9.5)  | 50<br>(5.2)   | 603<br>(11.3)  | 115<br>(4.1)  | 842<br>(8.8)   | 0             | 0              | 0             | 0              |
| <b>Latin America</b>   | 404<br>(21.9) | 1713<br>(17.3) | 848<br>(24.2) | 6090<br>(35.3) | 854<br>(36.5) | 5704<br>(46.7) | 587<br>(61.3) | 3265<br>(61.1) | 429<br>(15.4) | 1397<br>(14.5) | 0             | 0              | 0             | 0              |
| Argentina              | 199<br>(10.8) | 438<br>(4.4)   | 235<br>(6.7)  | 658<br>(3.8)   | 206<br>(8.8)  | 646<br>(5.3)   | 190<br>(19.8) | 492<br>(9.2)   | 168<br>(6.0)  | 448<br>(4.7)   | 0             | 0              | 0             | 0              |
| Chile                  | 0             | 0              | 2<br>(0.1)    | 771<br>(4.5)   | 117<br>(5.0)  | 732<br>(6.0)   | 0             | 0              | 0             | 0              | 0             | 0              | 0             | 0              |
| Columbia               | 103<br>(5.6)  | 577<br>(5.8)   | 64<br>(1.8)   | 1094<br>(6.3)  | 140<br>(6.0)  | 755<br>(6.2)   | 143<br>(14.9) | 766<br>(14.3)  | 162<br>(5.8)  | 749<br>(7.8)   | 0             | 0              | 0             | 0              |
| Dominican Republic     | 0             | 0              | 49<br>(1.4)   | 279<br>(1.6)   | 0             | 0              | 0             | 0              | 0             | 0              | 0             | 0              | 0             | 0              |

|                             |             |              |               |                |               |                |               |                |               |                |               |                |               |                |
|-----------------------------|-------------|--------------|---------------|----------------|---------------|----------------|---------------|----------------|---------------|----------------|---------------|----------------|---------------|----------------|
| Ecuador                     | 30<br>(1.6) | 258<br>(2.6) | 0             | 0              | 0             | 0              | 0             | 0              | 0             | 0              | 0             | 0              | 0             | 0              |
| Guatemala                   | 0           | 0            | 9<br>(0.3)    | 85<br>(0.5)    | 46<br>(2.0)   | 571<br>(4.7)   | 0             | 0              | 0             | 0              | 0             | 0              | 0             | 0              |
| Mexico                      | 0           | 0            | 373<br>(10.6) | 2620<br>(15.2) | 203<br>(8.7)  | 2439<br>(20.0) | 157<br>(16.4) | 1809<br>(33.9) | 0             | 0              | 0             | 0              | 0             | 0              |
| Panama                      | 0           | 0            | 13<br>(0.4)   | 31<br>(0.2)    | 0             | 0              | 0             | 0              | 0             | 0              | 0             | 0              | 0             | 0              |
| Venezuela                   | 72<br>(3.9) | 440<br>(4.4) | 103<br>(2.9)  | 552<br>(3.2)   | 142<br>(6.1)  | 561<br>(4.6)   | 97<br>(10.1)  | 198<br>(3.7)   | 99<br>(3.5)   | 200<br>(2.1)   | 0             | 0              | 0             | 0              |
| <b>Middle East</b>          | 0           | 0            | 410<br>(11.7) | 1906<br>(11.1) | 362<br>(15.5) | 2023<br>(16.6) | 205<br>(21.4) | 1161<br>(21.7) | 285<br>(10.2) | 2065<br>(21.5) | 222<br>(13.5) | 1956<br>(35.7) | 510<br>(25.5) | 1876<br>(29.8) |
| Gulf countries <sup>c</sup> | 0           | 0            | 58<br>(1.7)   | 268<br>(1.6)   | 88<br>(3.8)   | 369<br>(3.0)   | 0             | 0              | 0             | 0              | 0             | 0              | 0             | 0              |
| Iran                        | 0           | 0            | 0             | 0              | 199<br>(8.5)  | 808<br>(6.6)   | 0             | 0              | 0             | 0              | 39<br>(2.4)   | 399<br>(7.3)   | 160<br>(8.0)  | 403<br>(6.4)   |
| Iraq                        | 0           | 0            | 0             | 0              | 0             | 0              | 0             | 0              | 0             | 0              | 84<br>(5.1)   | 167<br>(3.0)   | 19<br>(1.0)   | 33<br>(0.5)    |
| Jordan                      | 0           | 0            | 0             | 0              | 0             | 0              | 0             | 0              | 17<br>(0.6)   | 296<br>(3.1)   | 12<br>(0.7)   | 286<br>(5.2)   | 41<br>(2.1)   | 309<br>(4.9)   |
| Kingdom of Saudi Arabia     | 0           | 0            | 66<br>(1.9)   | 353<br>(2.0)   | 72<br>(3.1)   | 252<br>(2.1)   | 76<br>(7.9)   | 203<br>(3.8)   | 96<br>(3.4)   | 199<br>(2.1)   | 0             | 0              | 96<br>(4.8)   | 245<br>(3.9)   |
| Kuwait                      | 0           | 0            | 0             | 0              | 0             | 0              | 0             | 0              | 0             | 0              | 25<br>(1.5)   | 190<br>(3.5)   | 20<br>(1.0)   | 199<br>(3.2)   |
| Lebanon                     | 0           | 0            | 286<br>(8.2)  | 1285<br>(7.5)  | 3<br>(0.1)    | 594<br>(4.9)   | 34<br>(3.5)   | 582<br>(10.9)  | 98<br>(3.5)   | 1059<br>(11.0) | 1<br>(0.1)    | 595<br>(10.9)  | 64<br>(3.2)   | 231<br>(3.7)   |
| Pakistan <sup>b</sup>       | 0           | 0            | 0             | 0              | 0             | 0              | 0             | 0              | NA            | NA             | NA            | NA             | 58<br>(2.9)   | 208<br>(3.3)   |
| United Arab Emirates        | 0           | 0            | 0             | 0              | 0             | 0              | 95<br>(9.9)   | 376<br>(7.0)   | 74<br>(2.7)   | 511<br>(5.3)   | 61<br>(3.7)   | 319<br>(5.8)   | 52<br>(2.6)   | 248<br>(3.9)   |

<sup>a</sup>Not all countries in each region were included in each wave; <sup>b</sup>Pakistan was listed under 'Asia' region in Wave 5 and Wave 6, and under 'Middle East' region in Wave 7; <sup>c</sup>Could include countries listed separately in other waves.

NA, not applicable; T1D, type 1 diabetes; T2D, type 2 diabetes

**ESM Table 2.** Diabetes therapy use in patients with type 1 and type 2 diabetes

|                                              | <b>Wave 1<br/>2005</b> | <b>Wave 2<br/>2006</b> | <b>Wave 3<br/>2008</b> | <b>Wave 4<br/>2010</b> | <b>Wave 5<br/>2011–12</b> | <b>Wave 6<br/>2013–14</b> | <b>Wave 7<br/>2016–17</b> |
|----------------------------------------------|------------------------|------------------------|------------------------|------------------------|---------------------------|---------------------------|---------------------------|
| <b>Type 1 diabetes (N=15,079)</b>            | <b>(n=1845)</b>        | <b>(n=3507)</b>        | <b>(n=2337)</b>        | <b>(n=958)</b>         | <b>(n=2789)</b>           | <b>(n=1643)</b>           | <b>(n=2000)</b>           |
| <b>Healthy diet and exercise plan, n (%)</b> | -                      | -                      | -                      | 546 (58.0)             | 1863 (68.0)               | 1033 (64.8)               | 1135 (58.3)               |
| <b>GLP-1 RA, n (%)</b>                       | -                      | -                      | -                      | 15 (1.6)               | 31 (1.1)                  | 7 (0.4)                   | 10 (0.5)                  |
| <b>Amylin agonist, n (%)</b>                 | -                      | -                      | -                      | 1 (0.1)                | 3 (0.1)                   | 0                         | 3 (0.2)                   |
| <b>Insulin, n (%)</b>                        | 1845 (100.0)           | 3507 (100.0)           | 2337 (100.0)           | 958 (100.0)            | 2789 (100.0)              | 1643 (100.0)              | 2000 (100.0)              |
| Basal alone                                  | 223 (12.2)             | 509 (14.6)             | 382 (16.4)             | 96 (11.7)              | 161 (5.8)                 | 45 (2.7)                  | 62 (3.1)                  |
| Prandial alone                               | 55 (3.0)               | 85 (2.4)               | 59 (2.5)               | 19 (2.3)               | 78 (2.8)                  | 41 (2.5)                  | 77 (3.9)                  |
| Premix alone                                 | 443 (24.2)             | 800 (22.9)             | 422 (18.1)             | 141 (17.2)             | 509 (18.3)                | 318 (19.4)                | 388 (19.4)                |
| Basal + Prandial                             | 989 (53.9)             | 1814 (52.0)            | 1347 (57.9)            | 534 (65.0)             | 1885 (67.8)               | 1118 (68.2)               | 1332 (66.7)               |
| Other                                        | 124 (6.8)              | 282 (8.1)              | 117 (5.0)              | 31 (3.8)               | 149 (5.4)                 | 117 (7.1)                 | 139 (7.0)                 |
|                                              | <b>Wave 1<br/>2005</b> | <b>Wave 2<br/>2006</b> | <b>Wave 3<br/>2008</b> | <b>Wave 4<br/>2010</b> | <b>Wave 5<br/>2011–12</b> | <b>Wave 6<br/>2013–14</b> | <b>Wave 7<br/>2016–17</b> |
| <b>Type 2 diabetes (N=66,088)</b>            | <b>(n=9918)</b>        | <b>(n=17,232)</b>      | <b>(n=12,210)</b>      | <b>(n=5343)</b>        | <b>(n=9603)</b>           | <b>(n=5479)</b>           | <b>(n=6303)</b>           |
| <b>Healthy diet and exercise plan, n (%)</b> | -                      | -                      | -                      | 2566 (48.9)            | 5600 (59.8)               | 3052 (58.5)               | 3326 (54.7)               |
| <b>GLP-1 RA, n (%)</b>                       | -                      | -                      | -                      | 88 (1.7)               | 118 (1.2)                 | 95 (1.7)                  | 157 (2.5)                 |
| <b>Amylin agonist, n (%)</b>                 | -                      | -                      | -                      | 6 (0.1)                | 14 (0.1)                  | 7 (0.1)                   | 30 (0.5)                  |
| <b>OGLD, n (%)</b>                           | 8021 (81.0)            | 14,623 (84.9)          | 10,596 (87.1)          | 4904 (91.8)            | 8216 (85.6)               | 4767 (87.0)               | 5573 (88.4)               |
| <b>Class of OGLD</b>                         |                        |                        |                        |                        |                           |                           |                           |
| Metformin alone, n (%)                       | -                      | 3258 (18.9)            | 2517 (21.1)            | 1246 (23.6)            | 2342 (24.4)               | 1459 (26.6)               | 1638 (26.7)               |

|                                                    |             |              |             |             |             |             |             |
|----------------------------------------------------|-------------|--------------|-------------|-------------|-------------|-------------|-------------|
| Sulphonylureas alone, n (%)                        | -           | 2371 (13.8)  | 1331 (11.2) | 307 (5.8)   | 714 (7.4)   | 306 (5.6)   | 257 (4.2)   |
| Metformin with sulphonylureas, n (%)               | -           | 6478 (37.6)  | 4726 (39.6) | 2195 (41.6) | 3749 (39.0) | 2199 (40.1) | 2281 (37.2) |
| Other, n (%)                                       | -           | 2494 (14.5)  | 1781 (14.9) | 1092 (20.7) | 1409 (14.7) | 802 (14.6)  | 1223 (20.0) |
| <b>Insulin, n (%)</b>                              | 3232 (32.8) | 5131 (29.8)  | 3839 (31.5) | 1697 (31.8) | 3521 (36.7) | 2079 (37.9) | 2596 (41.2) |
| No insulin treatment                               | 6627 (67.3) | 12101 (70.3) | 8329 (68.6) | 3646 (70.8) | 6082 (63.4) | 3400 (62.1) | 3707 (58.8) |
| Basal alone                                        | 1043 (10.6) | 2336 (13.6)  | 1876 (15.4) | 823 (16.0)  | 1333 (13.9) | 793 (13.5)  | 845 (13.4)  |
| Prandial alone                                     | 90 (0.9)    | 118 (0.7)    | 81 (0.7)    | 32 (0.6)    | 40 (0.4)    | 16 (0.3)    | 41 (0.7)    |
| Premix alone                                       | 1547 (15.7) | 1672 (9.7)   | 920 (7.6)   | 255 (4.9)   | 1012 (10.5) | 624 (11.4)  | 931 (14.8)  |
| Basal + prandial                                   | 404 (4.1)   | 790 (4.6)    | 838 (6.9)   | 367 (7.1)   | 1046 (10.9) | 650 (11.9)  | 715 (11.3)  |
| Other                                              | 140 (1.4)   | 194 (1.1)    | 102 (0.8)   | 29 (0.6)    | 86 (0.9)    | 50 (0.9)    | 62 (1.0)    |
| <b>Patients treated with OGLD only, n (%)</b>      | 6389 (64.4) | 11403 (66.2) | 7979 (65.3) | 3530 (66.1) | 5912 (61.6) | 3321 (60.6) | 3637 (57.7) |
| <b>Patients treated with OGLD + insulin, n (%)</b> | 1632 (16.5) | 3220 (18.7)  | 2617 (21.4) | 1374 (25.7) | 2304 (24.0) | 1446 (26.4) | 1936 (30.7) |
| <b>Patients treated with insulin only, n (%)</b>   | 1600 (16.1) | 1911 (11.1)  | 1222 (10.0) | 323 (6.0)   | 1217 (12.7) | 633 (11.6)  | 660 (10.5)  |

Eligible population. GLP-1 RA, glucagon-like peptide-1 receptor agonist; OGLD, oral glucose- lowering drug.

Percentages were calculated for patients with available data; these varied by each category/wave

**ESM Table 3.** Renal function of patients with type 1 and type 2 diabetes (overall and divided by therapy type): W7 data only

| Renal function (eGFR mL min <sup>-1</sup><br>1.73 m <sup>-2</sup> ), % | Stage 1<br>eGFR ≥90 | Stage 2<br>eGFR 60–89 | Stage 3<br>eGFR 30–59 | Stage 4<br>eGFR 15–29 | Stage 5<br>eGFR <15 |
|------------------------------------------------------------------------|---------------------|-----------------------|-----------------------|-----------------------|---------------------|
| <b>% of patients at each stage</b>                                     |                     |                       |                       |                       |                     |
| <b>Type 1 diabetes (n=2000)</b>                                        | 64.6                | 24.9                  | 6.8                   | 1.1                   | 2.6                 |
| <b>Type 2 diabetes (n=6303)</b>                                        | 36.8                | 41.7                  | 17.6                  | 1.7                   | 2.3                 |
| OGLD only (n=3637)                                                     | 40.7                | 41.6                  | 14.4                  | 1.0                   | 2.3                 |
| OGLD + insulin (n=1936)                                                | 33.2                | 43.4                  | 20.5                  | 1.1                   | 1.8                 |
| Insulin only (n=660)                                                   | 26.7                | 36.1                  | 25.9                  | 6.7                   | 4.6                 |

Eligible population. eGFR, estimated glomerular filtration rate; OGLD, oral glucose-lowering drug  
Percentages were calculated for patients with available data; these varied by each category/wave

**ESM Table 4.** Hypertension, dyslipidaemia and associated therapy use in patients with type 1 and type 2 diabetes

|                                                       | <b>Wave 1<br/>2005</b> | <b>Wave 2<br/>2006</b> | <b>Wave 3<br/>2008</b> | <b>Wave 4<br/>2010</b> | <b>Wave 5<br/>2011–12</b> | <b>Wave 6<br/>2013–14</b> | <b>Wave 7<br/>2016–17</b> |
|-------------------------------------------------------|------------------------|------------------------|------------------------|------------------------|---------------------------|---------------------------|---------------------------|
| <b>Type 1 diabetes</b>                                | <b>(n=1845)</b>        | <b>(n=3507)</b>        | <b>(n=2337)</b>        | <b>(n=958)</b>         | <b>(n=2789)</b>           | <b>(n=1643)</b>           | <b>(n=2000)</b>           |
| <b>Hypertension diagnosis<sup>a</sup></b>             | 416 (22.7)             | 762 (21.8)             | 507 (21.8)             | 214 (22.4)             | 590 (21.2)                | 367 (22.4)                | 396 (19.9)                |
| <b>Patients treated for hypertension<sup>b</sup></b>  | 394 (94.9)             | 731 (95.9)             | 491 (96.8)             | 210 (98.1)             | 571 (97.1)                | 357 (97.3)                | 375 (95.2)                |
| <b>Dyslipidaemia diagnosis<sup>a</sup></b>            | 408 (22.6)             | 808 (25.0)             | 572 (26.1)             | 320 (34.7)             | 617 (23.0)                | 379 (24.2)                | 502 (28.9)                |
| <b>Patients treated for dyslipidaemia<sup>c</sup></b> | 260 (63.9)             | 583 (72.4)             | 449 (78.8)             | 261 (81.6)             | 469 (76.3)                | 283 (74.9)                | 367 (77.8)                |
| <b>CV treatments</b>                                  |                        |                        |                        |                        |                           |                           |                           |
| ACEi <sup>d</sup>                                     | 256 (65.0)             | 442 (61.0)             | 243 (49.5)             | 87 (41.6)              | 342 (60.2)                | 231 (64.7)                | 208 (55.9)                |
| ARB <sup>d</sup>                                      | 71 (18.0)              | 201 (27.7)             | 195 (39.7)             | 100 (47.8)             | 180 (31.7)                | 102 (28.6)                | 114 (30.6)                |
| CCB <sup>d</sup>                                      | 91 (23.1)              | 186 (25.7)             | 140 (28.5)             | 59 (28.2)              | 120 (21.1)                | 76 (21.3)                 | 67 (18.0)                 |
| Diuretics <sup>d</sup>                                | 121 (30.7)             | 212 (29.2)             | 120 (24.4)             | 53 (25.4)              | 175 (30.8)                | 106 (29.7)                | 84 (22.6)                 |
| Statins <sup>e</sup>                                  | 202 (77.7)             | 475 (81.8)             | 390 (86.9)             | 219 (83.9)             | 416 (88.7)                | 256 (90.5)                | 333 (90.7)                |
|                                                       | <b>Wave 1<br/>2005</b> | <b>Wave 2<br/>2006</b> | <b>Wave 3<br/>2008</b> | <b>Wave 4<br/>2010</b> | <b>Wave 5<br/>2011–12</b> | <b>Wave 6<br/>2013–14</b> | <b>Wave 7<br/>2016–17</b> |
| <b>Type 2 diabetes</b>                                | <b>(n=9918)</b>        | <b>(n=17,232)</b>      | <b>(n=12,210)</b>      | <b>(n=5343)</b>        | <b>(n=9603)</b>           | <b>(n=5479)</b>           | <b>(n=6303)</b>           |
| <b>Hypertension diagnosis<sup>a</sup></b>             | 6029 (60.9)            | 10,681 (62.5)          | 7422 (61.0)            | 3254 (61.1)            | 6315 (66.0)               | 3623 (66.4)               | 4166 (66.2)               |
| <b>Patients treated for hypertension<sup>b</sup></b>  | 5787 (96.2)            | 10,344 (96.9)          | 7206 (97.3)            | 3195 (98.2)            | 6193 (98.3)               | 3555 (98.5)               | 4074 (98.0)               |
| <b>Dyslipidaemia diagnosis<sup>a</sup></b>            | 4844 (49.3)            | 9609 (60.2)            | 7267 (62.5)            | 3485 (67.2)            | 5855 (63.4)               | 3449 (64.8)               | 3970 (68.9)               |



|                                                       |             |             |             |             |             |             |             |
|-------------------------------------------------------|-------------|-------------|-------------|-------------|-------------|-------------|-------------|
| <b>Patients treated for dyslipidaemia<sup>c</sup></b> | 3785 (78.4) | 7866 (82.0) | 6275 (86.7) | 3051 (87.7) | 5170 (88.7) | 3094 (90.0) | 3552 (91.1) |
| <b>CV therapies</b>                                   |             |             |             |             |             |             |             |
| ACEi <sup>d</sup>                                     | 3222 (55.7) | 5100 (49.5) | 3171 (44.0) | 1228 (38.6) | 2939 (47.7) | 1678 (47.4) | 1668 (41.1) |
| ARB <sup>d</sup>                                      | 1400 (24.2) | 3325 (32.3) | 2888 (40.1) | 1532 (48.1) | 2445 (39.7) | 1397 (39.5) | 1770 (43.6) |
| CCB <sup>d</sup>                                      | 1811 (31.3) | 3280 (31.8) | 2202 (30.6) | 850 (26.7)  | 1655 (26.8) | 1125 (31.8) | 1384 (34.1) |
| Diuretics <sup>d</sup>                                | 1834 (31.7) | 3325 (32.3) | 2093 (29.0) | 986 (31.0)  | 2327 (37.7) | 1393 (39.4) | 1567 (38.6) |
| Statins <sup>e</sup>                                  | 2968 (78.6) | 6273 (80.1) | 5154 (82.1) | 2512 (82.3) | 4558 (88.2) | 2819 (91.1) | 3365 (94.7) |

<sup>a</sup>Diagnosis recorded as 'Yes/No' by the treating physician; <sup>b</sup>Of the patients diagnosed with hypertension; <sup>c</sup>Of the patients diagnosed with dyslipidaemia; <sup>d</sup>Of the patients treated for hypertension; <sup>e</sup>Of the patients treated for dyslipidaemia.

ACEi, angiotensin-converting enzyme inhibitor; ARB, angiotensin II receptor blocker; CCB, calcium channel blocker; CV, cardiovascular

Percentages were calculated for patients with available data; these varied by each category/wave
